# Supplementary material for: Accelerated growth increases the somatic epimutation rate in trees
Source: Research Square preprint supplement (doi:10.21203/rs.3.rs-5925337/v1), 2025-03-07
Supplement: Supplementary file 3 [file c626a3f9bcbe557951279408.xlsx]

## Sheet: Sheet1
Table S1: Sequencing and mapping summary
Tree	Sample_ID	WGBS	#Raw_reads	#Clean_reads	#Unique_ alignments	%Mapping_ efficiency	%Mapping_ rate	Sequencing_depth	%Genome_ coverage	CG_rc_meth_lvl	CHG_rc_meth_lvl	CHH_rc_meth_lvl	CG_methylation_ level	CHG_methylation_level	CHH_methylation_level	Conversation_rate
171	171-WA1-25.3	FCHTMVTDSXY_L4_BEElpmMAAWAAA-13	150083548	144787563	64523641	44.6	68.32	27.1809	74.6731	0.623843	0.367706	0.0343368	0.610759	0.349592	0.027701	NA
171	171-W1.2A-38	FCHTMVTDSXY_L4_BEElpmMAAWCAA-18	150741789	145209897	64695560	44.6	70.79	27.5001	74.0141	0.625521	0.371853	0.0370468	0.623701	0.365333	0.0303542	NA
171	171-O1.1A-38.5	FCHYWH5DSXY_L2_BEEzpxnH000634-9	84584490	82652486	36001930	43.6	73.62	14.8734	70.0104	0.629416	0.37952	0.0434856	0.667179	0.423697	0.036972	NA
171	171-W1.2-38-sample1	FCHYWH5DSXY_L2_BEEzpxnH000635-16	84792627	82838205	35987716	43.4	75.87	14.8217	70.5166	0.631334	0.381828	0.0423891	0.676459	0.437121	0.0360882	NA
171	171-AW-25.3	FCHYWH5DSXY_L2_BEEzpxnH000636-18	84863655	82853103	37777322	45.6	73.95	15.6014	71.3618	0.62687	0.372498	0.0366497	0.655627	0.402191	0.0309628	NA
171	171-O1.1-A-38.5	FCHYWH5DSXY_L2_BEEzpxnH000637-19	84918703	83046825	35251697	42.4	67.81	14.8396	71.5319	0.627247	0.376589	0.040398	0.651299	0.39886	0.0342217	NA
171	171-O1.1A-39.4	FCHYWH5DSXY_L2_BEEzpxnH000639-21	85176527	83259990	35476874	42.6	71.45	14.4527	69.7354	0.630511	0.379482	0.0418989	0.677866	0.433989	0.0363955	NA
171	171-O1A1-30.6	FCHYWHYDSXY_L4_BEEzpxnH000658-54	85941302	84267065	39325604	46.7	74.33	17.398	70.4666	0.626901	0.374618	0.0433949	0.636829	0.384016	0.035432	NA
171	171-O1.1-A1-37.8	FCHYWHYDSXY_L4_BEEzpxnH000660-56	84627000	83049620	38058699	45.8	72.74	16.7348	71.6988	0.631211	0.383442	0.0451881	0.660046	0.413312	0.0389482	NA
171	171-O1-A-36.0	FCHYWHYDSXY_L4_BEEzpxnH000666-62	75716444	74126546	35195841	47.5	75.52	15.0608	71.4213	0.62835	0.378356	0.0434734	0.650022	0.392508	0.036475	NA
109	109-N1-36.6-sample2	FCHYWH5DSXY_L2_BEEzpxnH000641-26	85386270	83515747	40356483	48.3	77.35	17.0408	71.4233	0.625627	0.366117	0.0369972	0.65707	0.394744	0.0309358	NA
109	109-N22-33A	FCHYWH5DSXY_L2_BEEzpxnH000643-28	84770747	82748729	37580614	45.4	74.05	15.5389	71.5261	0.626904	0.367516	0.0377896	0.654016	0.391731	0.0313328	NA
109	109-N21-35.3A-sample1	FCHYWH5DSXY_L2_BEEzpxnH000646-32	85781898	83838891	37873380	45.2	73.33	15.8033	71.2067	0.623625	0.362905	0.0357891	0.642527	0.372892	0.0290719	NA
109	109-S-31.8-A	FCHYWH5DSXY_L2_BEEzpxnH000647-36	85421061	83419047	32616792	39.1	65.59	13.7608	69.0788	0.628027	0.369347	0.0384499	0.675493	0.420435	0.0325411	NA
109	109-N21-32A	FCHYWH5DSXY_L3_BEEzpxnH000648-40	84822321	82960826	33936211	40.9	66.76	14.9052	70.3156	0.625828	0.365924	0.0375254	0.65974	0.399578	0.0314596	NA
109	109-S35.6-A1	FCHYWH5DSXY_L3_BEEzpxnH000651-45	86330153	84441127	38139345	45.2	73.43	16.8125	71.0977	0.625007	0.365255	0.0369936	0.655134	0.392907	0.0312914	NA
109	109-S35.7-A21	FCHYWHYDSXY_L4_BEEzpxnH000664-60	82487437	80713113	38124785	47.2	77.01	16.3366	71.3127	0.628297	0.369483	0.0429352	0.666347	0.404806	0.0360097	NA
CB_43	CB11_43	CB11_43_EKDL240036045-1A_22HC35LT4_L1	149425723	111669040	56153384	50.3	69.2586	25.3076	77.1819	0.622587	0.397512	0.118661	0.564266	0.324619	0.102133	99.5086
CB_43	CB12_43	CB12_43_EKDL240036046-1A_22HC35LT4_L1	120667644	95735549	47968874	50.1	69.2356	21.7467	76.3633	0.622804	0.396296	0.118161	0.561162	0.32208	0.101256	99.6188
CB_43	CB2_43	CB2_43_EKDL240036047-1A_22HC35LT4_L1	119088001	94492722	49318496	52.2	72.0045	22.8639	76.0984	0.622866	0.398846	0.121374	0.565232	0.332733	0.109086	99.5544
CB_48	CB11_48	CB11_48_EKDL240036048-1A_22HC35LT4_L1	114439944	89683097	46160439	51.5	70.9098	21.3353	75.8186	0.618961	0.395693	0.12632	0.549115	0.317846	0.10819	99.4742
CB_48	CB12_48	CB12_48_EKDL240036049-1A_22HC35LT4_L1	143809884	115152473	59082865	51.3	69.8207	26.4025	77.336	0.624296	0.401474	0.128421	0.579652	0.338584	0.114354	99.4388
CB_48	CB2_48	CB2_48_EKDL240036050-1A_22HC35LT4_L1	124984488	96751958	49545144	51.2	69.3631	23.1425	76.1211	0.620737	0.399428	0.126474	0.56773	0.328871	0.109482	99.5711
CB_49	CB12_49	CB12_49_EKDL240036052-1A_22HC35LT4_L1	127992377	112321500	53064581	47.2	61.2154	19.1315	74.7837	0.628382	0.408161	0.148415	0.669436	0.475291	0.209225	99.0919
CB_49	CB2_49	CB2_49_EKDL240036053-1A_22HC35LT4_L1	147858195	128550454	62890188	48.9	64.3023	25.7816	76.4357	0.635379	0.411988	0.138788	0.680478	0.475542	0.179392	99.5902
CB_62	CB12_62	CB12_62_EKDL240036055-1A_22HC35LT4_L1	153928293	131174810	63613090	48.5	64.4698	27.785	77.1643	0.635686	0.420147	0.148399	0.681986	0.474898	0.181519	99.4297
CB_62	CB2_62	CB2_62_EKDL240036056-1A_22HC35LT4_L2	142478263	125868937	60765788	48.3	65.5547	24.089	77.3597	0.63644	0.418575	0.139529	0.662427	0.450718	0.160837	99.5529
CC_103	CC12_103	CC12_103_EKDL240036058-1A_22HC35LT4_L2	141807827	124044138	59315706	47.8	63.3548	23.6277	76.0684	0.63566	0.422346	0.151534	0.682551	0.490338	0.196867	99.2
CC_103	CC2_103	CC2_103_EKDL240036059-1A_22HC35LT4_L2	162292695	143341994	63419011	44.2	59.0035	20.1433	75.6312	0.632449	0.419418	0.153921	0.676868	0.494623	0.210464	99.1067
CC_168	CC11_168	CC11_168_EKDL240036060-1A_22HC35LT4_L2	132196431	108149503	55593019	51.4	70.3334	24.7764	77.8325	0.627453	0.402945	0.119395	0.570813	0.338891	0.10749	99.547
CC_168	CC12_168	CC12_168_EKDL240036061-1A_22HC35LT4_L2	116042990	98252374	48494438	49.4	67.3392	21.8063	77.0342	0.632879	0.40987	0.126628	0.617381	0.391264	0.128428	99.5519
CC_168	CC2_168	CC2_168_EKDL240036062-1A_22HC35LT4_L2	130029434	113750931	56095955	49.3	67.3737	23.6687	77.5503	0.627349	0.396917	0.112323	0.589738	0.346226	0.103688	99.4665
CC_173	CC11_173	CC11_173_EKDL240036063-1A_22HC35LT4_L2	142175362	115756360	54682583	47.2	68.505	23.9144	76.2856	0.621514	0.395653	0.103694	0.538013	0.319111	0.0932249	99.2152
CC_173	CC12_173	CC12_173_EKDL240036064-1A_22HC35LT4_L2	146742759	119847346	58225889	48.6	69.4063	25.1974	77.049	0.622821	0.396717	0.104944	0.553049	0.325257	0.0933213	99.5333
CC_173	CC2_173	CC2_173_EKDL240036065-1A_22HC35LT4_L2	153806986	115511396	57652113	49.9	71.4748	26.0963	76.8003	0.623195	0.395058	0.105628	0.553197	0.324876	0.0918136	99.496
